# Supplementary material for: Demographically-Based Evaluation of Genomic Regions under Selection in Domestic Dogs
Source: PubMed Central journal article supplement (PMC4778760; doi:10.1371/journal.pgen.1005851), 2016-03-04

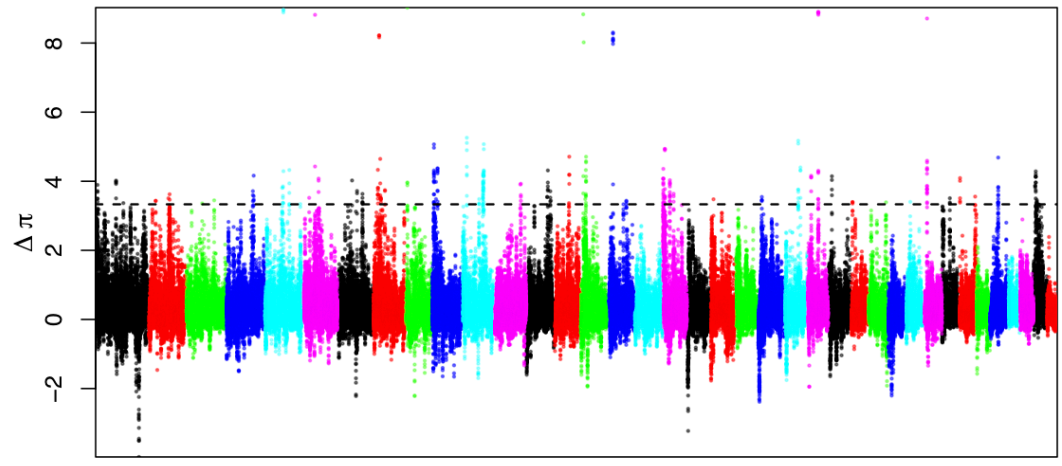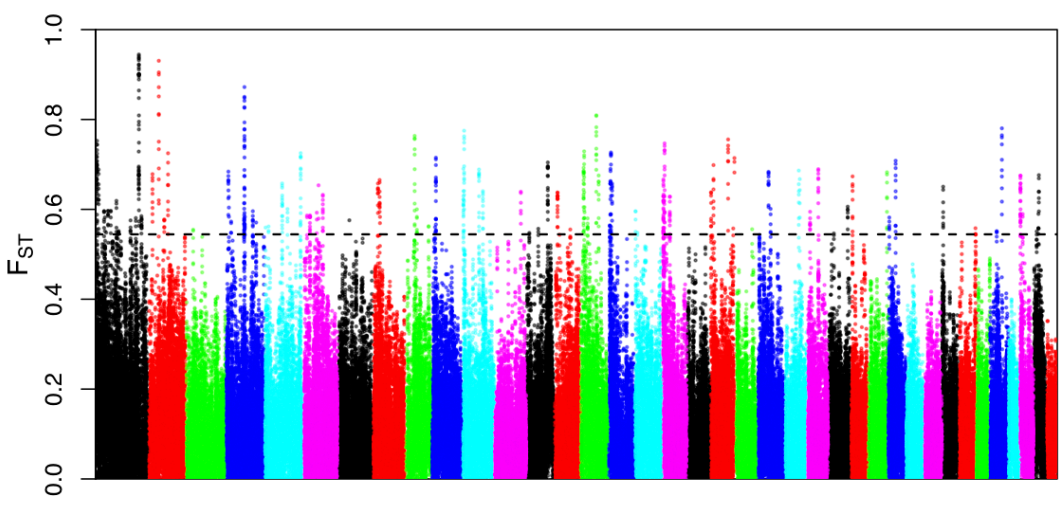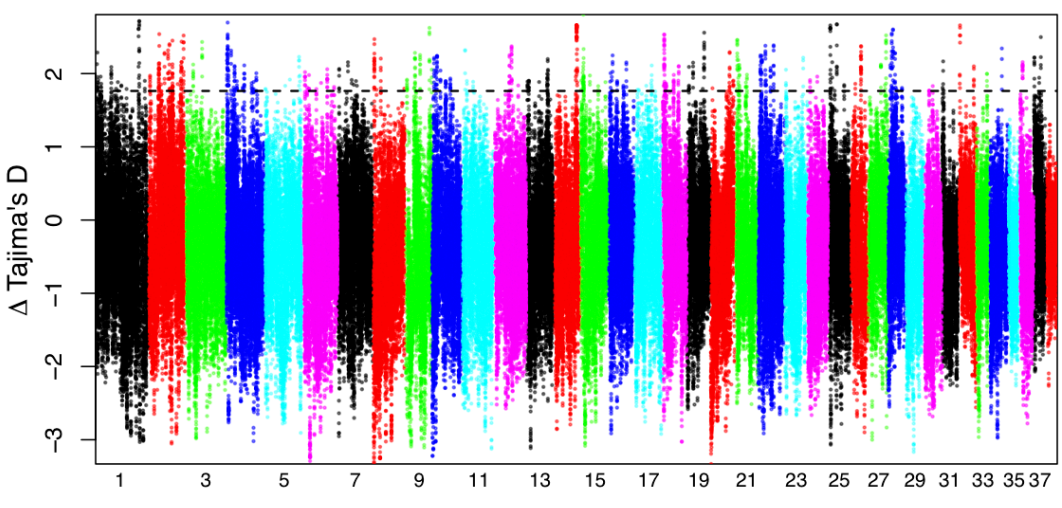

Supplement: pgen.1005851.s003.pdf [file pgen.1005851.s003.pdf]
