# Supplementary material for: Demographically-Based Evaluation of Genomic Regions under Selection in Domestic Dogs
Source: PubMed Central journal article supplement (PMC4778760; doi:10.1371/journal.pgen.1005851), 2016-03-04
Supplement: pgen.1005851.s010.pdf [file pgen.1005851.s010.pdf]

| Region            | This Study  |      |             |                      | CanMap Data |      |       | Other Selection Studies |     |      |    | Genes                                                                   |
|-------------------|-------------|------|-------------|----------------------|-------------|------|-------|-------------------------|-----|------|----|-------------------------------------------------------------------------|
|                   | $\Delta\pi$ | Fst  | $\Delta$ TD | CMS <sub>1-FDR</sub> | $\Delta\pi$ | Fst  | Joint | 1                       | 2   | 3    | 4  |                                                                         |
| chr18:15.49-15.78 | 4.03        | 0.63 | 1.74        | 0.97                 | 0.76        | 0.7  | 99.25 | 94.8                    |     |      |    | LHFPL3                                                                  |
| chr18:0.57-1.02   | 4.36        | 0.67 | 1.62        | 0.97                 |             |      |       |                         |     |      | 28 |                                                                         |
| chr19:3.55-3.72   | 3.16        | 0.51 | 2.09        | 0.93                 | 0.58        | 0.83 | 99.22 | 93.1                    |     |      |    | CCRN4L                                                                  |
| chr31:1.95-2.14   | 2.9         | 0.65 | 2.17        | 0.92                 | 0.54        | 0.4  | 94.22 |                         |     |      |    | CADM2                                                                   |
| chr12:59.02-59.17 | 3.93        | 0.64 | 1.32        | 0.92                 | -1.06       | 0.01 | 0.57  |                         |     |      |    | RPL3;ACA64                                                              |
| chr10:4.04-4.22   | 2.42        | 0.53 | 2.21        | 0.9                  | 0.3         | 0.61 | 96.02 |                         |     |      | 18 | SNORA31                                                                 |
| chr11:37.55-37.76 | 3.18        | 0.69 | 1.62        | 0.89                 | 0.03        | 0.47 | 79.33 |                         |     |      |    | SH3GL2                                                                  |
| chr24:4.37-4.59   | 2.17        | 0.59 | 1.91        | 0.89                 | 0.12        | 0.12 | 48.36 |                         |     |      |    | DTD1                                                                    |
| chr24:23.25-23.48 | 8.91        | 0.69 | 1.4         | 0.89                 |             |      |       |                         | 0.7 | 0.64 |    | ASIP;AHCY;unknown                                                       |
| chr02:21.9-22.16  | 1.87        | 0.93 | 2.14        | 0.88                 | 0.18        | 0.19 | 68.71 |                         |     |      |    | FAM107B                                                                 |
| chr32:0.64-0.78   | 4.09        | 0.43 | 2.66        | 0.88                 |             |      |       |                         |     |      |    | ART3;NUP54;unknown;SCARB2                                               |
| chr13:46.85-47.02 | 3.54        | 0.42 | 2           | 0.87                 | 0.19        | 0.54 | 92.4  | 92.5                    |     |      |    |                                                                         |
| chr13:53.99-54.13 | 3.71        | 0.43 | 1.65        | 0.87                 | 0.05        | 0.3  | 75.43 |                         |     |      |    | unknown                                                                 |
| chr01:2.93-3.19   | 2.75        | 0.75 | 2.13        | 0.86                 | -0.04       | 0.13 | 40.36 |                         |     |      | 1  | MBP;ZNF236                                                              |
| chr01:28.36-28.52 | 2.83        | 0.6  | 1.52        | 0.85                 | 0.1         | 0.51 | 87.23 | 93.3                    |     |      |    | PDE7B                                                                   |
| chr02:46.35-46.53 | 3.19        | 0.43 | 2.4         | 0.85                 | -1.39       | 0.34 | 3.67  |                         |     |      |    |                                                                         |
| chr06:28.39-28.49 | 2.1         | 0.45 | 1.79        | 0.83                 | 0.24        | 0.52 | 93.8  |                         |     |      |    | unknown;PDXDC1;NTAN1;RRN3                                               |
| chr04:57.36-57.48 | 2.49        | 0.45 | 1.87        | 0.82                 | 0.16        | 0.62 | 91.71 |                         |     |      |    | GLRA1                                                                   |
| chr37:16.14-16.27 | 1.9         | 0.46 | 2.5         | 0.82                 | 0.47        | 0.67 | 98.18 | 91.5                    |     |      |    | PLEKHM3                                                                 |
| chr04:60.02-60.27 | 3.71        | 0.6  | 1.01        | 0.81                 | -0.14       | 0.52 | 54.44 |                         |     |      |    |                                                                         |
| chr15:9.83-9.93   | 3.48        | 0.47 | 1.12        | 0.81                 | -0.36       | 0.4  | 31.01 |                         |     |      |    | EPS15;TTC39A                                                            |
| chr08:71.21-71.31 | 3.11        | 0.4  | 1.79        | 0.8                  |             |      |       |                         |     |      |    | MARK3;U2;CKB;TRMT61A;BAG5;APOPT1                                        |
| chr04:61.87-62.1  | 4.16        | 0.43 | 1.89        | 0.8                  | 0.04        | 0.21 | 64.58 |                         |     |      |    | unknown                                                                 |
| chr16:39.84-39.99 | 3.44        | 0.39 | 2.15        | 0.8                  | -0.11       | 0.07 | 19.51 |                         |     |      |    |                                                                         |
| chr04:4.17-4.34   | 2.54        | 0.42 | 2.04        | 0.8                  | -1.29       | 0.06 | 1.34  |                         |     |      |    | LYST;unknown;GNG4                                                       |
| chr17:5.62-5.74   | 1.79        | 0.55 | 1.78        | 0.78                 | 0.74        | 0.37 | 93.72 |                         |     |      |    |                                                                         |
| chr11:48.48-48.71 | 5.07        | 0.4  | 1.58        | 0.78                 |             |      |       |                         |     |      |    |                                                                         |
| chr10:3.72-3.98   | 5.07        | 0.39 | 1.44        | 0.78                 |             |      |       |                         |     |      | 18 |                                                                         |
| chr36:0.34-0.52   | 1.68        | 0.67 | 1.63        | 0.77                 |             |      |       |                         |     |      |    | MINOS1                                                                  |
| chr02:53.12-53.38 | 2.24        | 0.41 | 2.45        | 0.77                 | 0.27        | 0.41 | 91.98 |                         |     |      |    |                                                                         |
| chr26:8.68-8.79   | 2.91        | 0.38 | 1.86        | 0.75                 | -0.05       | 0.1  | 29.52 |                         |     |      |    | CUX2                                                                    |
| chr01:46.69-46.83 | 4.02        | 0.4  | 1.17        | 0.75                 | -0.15       | 0.11 | 26.5  |                         |     |      | 2  | ARID1B                                                                  |
| chr18:24.04-24.16 | 2.41        | 0.39 | 1.89        | 0.75                 |             |      |       | 90.3                    |     |      |    |                                                                         |
| chr28:8.2-8.3     | 1.55        | 0.42 | 1.81        | 0.74                 | 0.31        | 0.56 | 95.59 | 97.4                    |     |      |    | PLCE1                                                                   |
| chr14:50.91-51.34 | 2.49        | 0.43 | 2.66        | 0.74                 | -0.7        | 0.48 | 15.13 |                         |     |      |    | LRRN3                                                                   |
| chr34:14.47-14.61 | 2.24        | 0.55 | 0.97        | 0.73                 |             |      |       |                         |     |      |    | unknown                                                                 |
| chr04:40.19-40.59 | 0.98        | 0.61 | 2.11        | 0.73                 | 0.06        | 0.05 | 19.88 |                         |     |      |    | C5orf50                                                                 |
| chr26:2.42-2.61   | 3.4         | 0.67 | 0.96        | 0.72                 | -0.01       | 0.65 | 73.88 |                         |     |      |    | TMEM132D                                                                |
| chr34:26.31-26.51 | 1.4         | 0.78 | 2.34        | 0.72                 | -0.09       | 0.24 | 51.37 |                         |     |      |    | IFT80;SMC4;cfa-mir-15b;cfa-mir-16-2;TRIM59                              |
| chr11:46.55-46.92 | 4.23        | 0.64 | 1.14        | 0.7                  |             |      |       |                         |     |      |    | cfa-mir-876;unknown                                                     |
| chr16:4.83-4.93   | 2.24        | 0.56 | 0.86        | 0.69                 | 0.81        | 0.76 | 99.56 |                         |     |      |    |                                                                         |
| chr11:9.72-9.88   | 5.26        | 0.41 | 0.9         | 0.68                 | 0.08        | 0.13 | 49.56 |                         |     |      |    |                                                                         |
| chr04:40.74-41.09 | 1.2         | 0.87 | 1.26        | 0.68                 | -0.96       | 0.07 | 2.91  |                         |     |      | 10 | RANBP17                                                                 |
| chr06:25.29-25.4  | 8.82        | 0.44 | 0.94        | 0.67                 |             |      |       |                         |     |      |    | GPR139;GPRC5B                                                           |
| chr32:0.53-0.63   | 1.31        | 0.39 | 1.8         | 0.67                 |             |      |       |                         |     |      |    | SDAD1;unknown;CXCL10                                                    |
| chr02:43.98-44.08 | 3.51        | 0.35 | 1.37        | 0.67                 | -0.08       | 0.02 | 7.12  |                         |     |      |    | MAP3K1;SETD9;MIER3                                                      |
| chr31:3.09-3.19   | 2.29        | 0.35 | 1.77        | 0.67                 |             |      |       | 93.9                    |     |      |    |                                                                         |
| chr24:23.83-23.93 | 3.38        | 0.45 | 0.73        | 0.66                 | 0.38        | 0.27 | 84.69 |                         |     |      |    | NCOA6;GGT7;ACSS2                                                        |
| chr18:1.46-1.71   | 3.34        | 0.55 | 1.83        | 0.66                 |             |      |       |                         |     |      |    | C7orf72;IKZF1                                                           |
| chr37:4.38-4.57   | 4.29        | 0.42 | 0.77        | 0.63                 |             |      |       |                         |     |      |    |                                                                         |
| chr25:6.73-6.86   | 4.14        | 0.37 | 0.97        | 0.63                 |             |      |       |                         |     |      |    | unknown                                                                 |
| chr18:24.26-24.38 | 3.64        | 0.34 | 1.21        | 0.62                 | 0.29        | 0.55 | 95.28 | 90.3                    |     |      |    | SEMA3D                                                                  |
| chr01:79.87-80.05 | 3.11        | 0.58 | 0.63        | 0.61                 |             |      |       |                         |     |      | 4  | unknown                                                                 |
| chr21:7.19-7.34   | 2.2         | 0.33 | 2.12        | 0.6                  | 0.91        | 0.93 | 99.85 |                         |     |      |    | unknown;CCDC67                                                          |
| chr18:0.45-0.56   | 3.62        | 0.4  | 0.88        | 0.59                 |             |      |       |                         |     |      | 28 |                                                                         |
| chr04:41.7-41.83  | 1.47        | 0.58 | 0.73        | 0.59                 | -0.57       | 0.18 | 14.6  |                         |     |      |    | FOXI1;DOCK2                                                             |
| chr37:6.56-6.66   | 2.8         | 0.55 | 0.59        | 0.59                 | 0.28        | 0.15 | 60.86 |                         |     |      |    | unknown                                                                 |
| chr13:48.69-48.82 | 1.59        | 0.34 | 2.05        | 0.59                 | 0.22        | 0.3  | 85.08 |                         |     |      |    | SRP72;ARL9;THEGL;HOPX                                                   |
| chr10:6.39-6.5    | 2.92        | 0.56 | 0.53        | 0.57                 | -0.11       | 0.14 | 35.56 |                         |     |      |    |                                                                         |
| chr06:33.34-33.56 | 4.08        | 0.65 | 1.02        | 0.56                 | -0.11       | 0.29 | 52.43 |                         |     |      |    | ABAT;METTL22;unknown;TMEM114                                            |
| chr11:37.8-37.94  | 3.48        | 0.5  | 0.59        | 0.54                 |             |      |       |                         |     |      | 19 |                                                                         |
| chr01:21.15-21.26 | 2.2         | 0.58 | 0.49        | 0.53                 | 0.33        | 0.5  | 95.13 |                         |     |      |    | STARD6;POLI;MBD2                                                        |
| chr16:2.08-2.24   | 1.39        | 0.56 | 0.61        | 0.52                 | -0.01       | 0    | 0.5   |                         |     |      |    | unknown                                                                 |
| chr12:58.03-58.13 | 3.91        | 0.34 | 0.74        | 0.5                  | 0.45        | 0.19 | 72.03 |                         |     |      |    | MCHR2                                                                   |
| chr24:20.91-21.02 | 1           | 0.32 | 1.96        | 0.5                  | 0.15        | 0.15 | 57    |                         |     |      |    | DEFB122;CBD118;DEFB119;CBD121;CBD122;DEFB3L;CBD123;DEFB124;CBD124;REM1; |
| chr01:50.78-50.92 | 1.23        | 0.31 | 1.88        | 0.48                 | 0.42        | 0.45 | 95    | 95.8                    |     |      |    | unknown                                                                 |
| chr37:12.31-12.42 | 1.58        | 0.3  | 1.94        | 0.48                 | 0.34        | 0.38 | 92.04 |                         |     |      |    | RAPH1;unknown;U2                                                        |
| chr16:18.74-18.88 | 1.64        | 0.31 | 1.9         | 0.48                 | 0.37        | 0.64 | 97.09 |                         |     |      |    |                                                                         |
